# Supplementary material for: Sulfide-oxidation-assisted electrochemical water splitting for H2 production on a bifunctional Cu2S/nickel foam catalyst
Source: Royal Society of Chemistry journal article supplement (doi:10.1039/d1gc01857d), 2021-01-01
Supplement: d1gc01857d1.pdf [file d1gc01857d1.pdf]

## Supporting Information

# Sulfide-oxidation-assisted electrochemical water splitting for H<sub>2</sub> production on a bifunctional Cu<sub>2</sub>S/nickel foam catalyst

Yuhou Pei,<sup>a</sup> Jiong Cheng,<sup>a</sup> Heng Zhong,<sup>\*a,b,c</sup> Zhenfeng Pi,<sup>a</sup> Yu Zhao<sup>d</sup> and Fangming Jin<sup>a,b,c</sup>

<sup>a</sup> School of Environmental Science and Engineering, State Key Lab of Metal Matrix Composites, Shanghai Jiao Tong University, Shanghai 200240, P.R. China

<sup>b</sup> Center of Hydrogen Science, Shanghai Jiao Tong University, Shanghai, 200240, P.R. China

<sup>c</sup> Shanghai Institute of Pollution Control and Ecological Security, Shanghai 200092, P.R. China

<sup>d</sup> School of Electronic Information and Electrical Engineering, Shanghai Jiao Tong University, Shanghai 200240, P.R. China

\*Corresponding: zhong.h@sjtu.edu.cn

## Experimental Section

### Chemicals.

Metal nitrates ( $\text{Cu}(\text{NO}_3)_2 \cdot 3\text{H}_2\text{O}$  (99.0%),  $\text{Ni}(\text{NO}_3)_2 \cdot 6\text{H}_2\text{O}$  (98.0%),  $\text{Co}(\text{NO}_3)_2 \cdot 6\text{H}_2\text{O}$  (98.5%), and  $\text{Fe}(\text{NO}_3)_3 \cdot 9\text{H}_2\text{O}$  (98.5%)), urea (99.0%), and NaOH (96.0%) were purchased from Sinopharm Chemical Reagent Co., Ltd.  $\text{Na}_2\text{S} \cdot 9\text{H}_2\text{O}$  (98.0%) was purchased from Shanghai Lingfeng Chemical Reagent Co. Ltd. The Pt/C (20 wt%) was purchased from Innochem Chemical Reagent Co. Ltd. All chemicals employed in this work were used directly without any further purification.

### Material characterization.

Morphology and elemental dispersion of the electrode materials were observed by a field-emission scanning electronic microscopy (SEM, Zeiss, Sigma 500, 10 kV) with an energy dispersion X-ray spectroscopy (EDX) and a transmission electronic microscopy (TEM, JEOL, JEM 2100F, 200 kV). Crystal phases of electrode materials were measured by a Bruker D8 advance X-ray diffraction (XRD) instrument (Cu  $K\alpha$  radiation,  $\lambda = 1.5406 \text{ \AA}$ ) with a scanning rate of  $2^\circ \text{ min}^{-1}$  from  $10^\circ$  to  $80^\circ$  ( $2\theta$ ). X-ray photoelectron spectroscopy (XPS) was conducted on a ThermoFisher 250Xi XPS analyzer (Al  $K\alpha$ , 1486.6 eV). The binding energies of XPS results were calibrated by C1s peak at 284.6 eV. UV-visible (MAPADA UV-3100PC) spectrum was employed to test the anodic products of polysulfides. Inductively Coupled Plasma-Atomic Emission Spectrometry (ICP-AES, Thermo Scientific, iCAP7600) was used for element analysis.

### Hydrogen production analysis.

Hydrogen production was analyzed by a gas chromatography equipped with a thermal conductivity detector (GC-TCD, Agilent, 7890A). Ar gas was continuously purged into cathodic electrolyte ( $1 \text{ mol L}^{-1}$  NaOH) at a rate of 5 sccm, and the gas products were collected by a water-gas replacing method. The Faradaic efficiency of  $\text{H}_2$  production was calculated based on the following equation (1):

$$FE(\%) = \frac{2Fn}{It} \times 100\%, \quad (1)$$

where  $F$  is Faradaic constant ( $96485 \text{ C mol}^{-1}$ ),  $n$  is the amount of produced hydrogen gas (mol),  $I$  is the current (A), and  $t$  is the time (s) of electrolysis.

### **Recovery of elementary S by acidification.**

Anodic electrolyte after the SOR reaction was placed into an ice bath and was added with concentrated sulfuric acid dropwise until the  $pH$  changed to 1.0 to form yellow precipitates. The solid yellow products were then collected by filtration, washed by DI water, and dried at  $50 \text{ }^\circ\text{C}$  in the oven for further analysis.

### **Calculation details**

The theoretical calculations were performed using Vienna Ab-initio Simulation Package (VASP).<sup>[S1-3]</sup> The projector-augmented-wave (PAW) method was adopted for the pseudopotentials,<sup>[S4]</sup> and cut-off energy was set to 400 eV. The Perdew-Burke-Ernzerhof (PBE) exchange-correlation functional within the generalized gradient approximation (GGA) was used to describe the exchange-correlation energy.<sup>[S5]</sup> The convergence force and energy were set as  $0.05 \text{ eV/\AA}$  and  $0.001 \text{ eV}$ , respectively. The spin-polarization was considered during the calculations. The monoclinic  $\text{Cu}_2\text{S}$  slabs were established as the calculation models.<sup>[S6-8]</sup> The free energies of SOR steps were calculated by the equation:  $\Delta G = \Delta E_{\text{DFT}} + \Delta E_{\text{ZPE}} - T\Delta S$ , where  $\Delta E_{\text{DFT}}$  is the DFT energy difference, the  $\Delta E_{\text{ZPE}}$  and  $\Delta S$  are obtained by the zero-point energy correction and analysis of the variation of entropy, respectively.

**Table S1** Redox potentials of related substances in this work.<sup>[S9]1</sup>

| Redox couple                             | Potential (V vs. SHE) |
|------------------------------------------|-----------------------|
| Cu(OH) <sub>2</sub> /Cu <sub>2</sub> O   | -0.08                 |
| Ni <sup>2+</sup> /Ni                     | -0.26                 |
| Fe(OH) <sub>3</sub> /Fe(OH) <sub>2</sub> | -0.56                 |
| Co(OH) <sub>2</sub> /Co                  | -0.73                 |

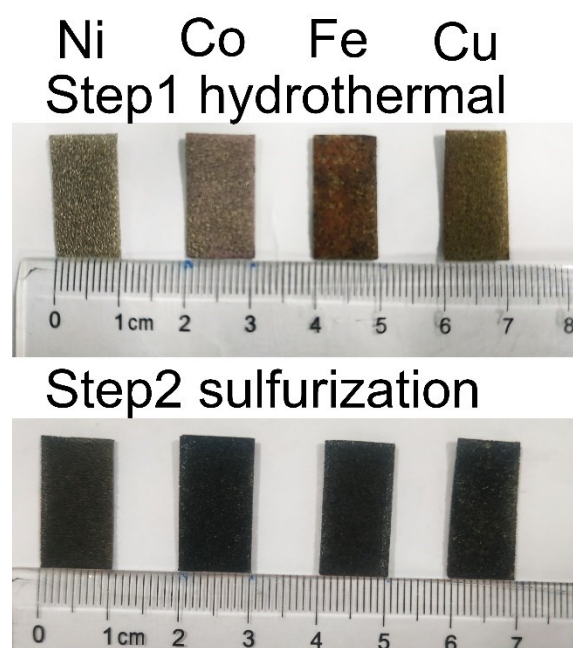**Figure S1** Photograph of metal (hydr-)oxides before (upper row) and after sulfurization (lower row) (the electrodes were fabricated via a hydrothermal step followed by a sulfurization step at room temperature).**Table S2**  $K_{sp}$  values of metal (hydr-)oxides and corresponding sulfides. <sup>[S9-S13]1-5</sup>

| (Hydr-)oxides       | $K_{sp}$              | Sulfides                       | $K_{sp}$              |
|---------------------|-----------------------|--------------------------------|-----------------------|
| Cu <sub>2</sub> O   | $2.0 \times 10^{-15}$ | Cu <sub>2</sub> S              | $2.5 \times 10^{-48}$ |
| Ni(OH) <sub>2</sub> | $5.9 \times 10^{-16}$ | NiS                            | $1.0 \times 10^{-24}$ |
| Co(OH) <sub>2</sub> | $5.9 \times 10^{-15}$ | CoS                            | $2.0 \times 10^{-25}$ |
| Fe(OH) <sub>3</sub> | $2.8 \times 10^{-39}$ | Fe <sub>2</sub> S <sub>3</sub> | $1.0 \times 10^{-88}$ |

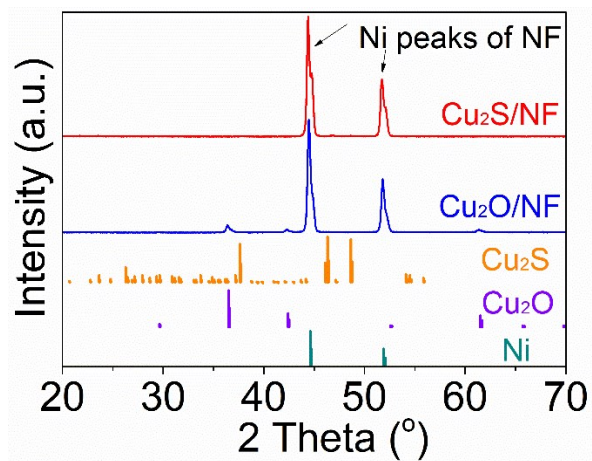

**Figure S2** XRD patterns of the  $\text{Cu}_2\text{O}/\text{NF}$  and  $\text{Cu}_2\text{S}/\text{NF}$  electrodes at the full scale of intensity (partial magnified image can be found in Fig. 1b of the main text).

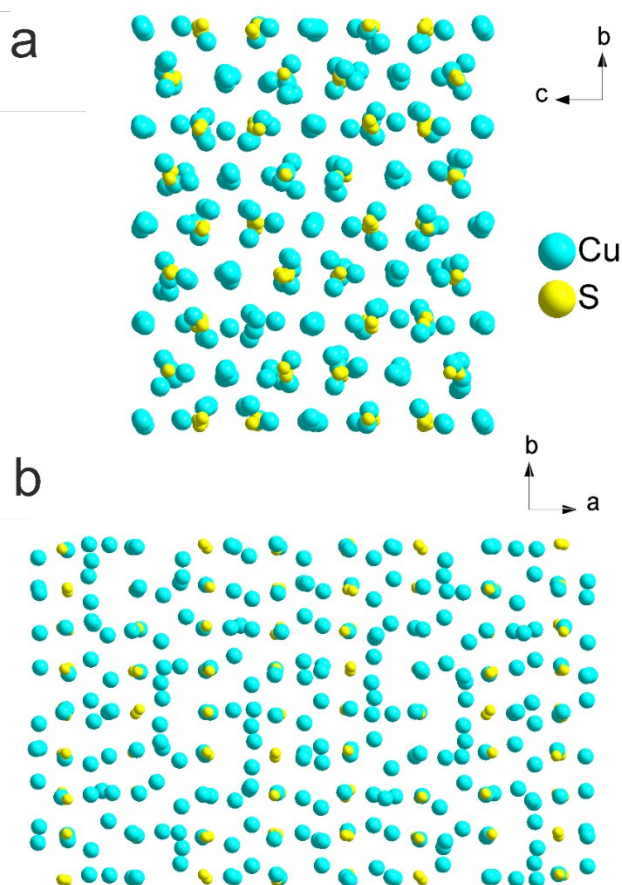

**Figure S3** Crystal structure of monoclinic  $\text{Cu}_{31}\text{S}_{16}$  from the view along **a** and **c**-axis. Space group  $P21/n$ ,  $a=26.897 \text{ \AA}$ ,  $b=15.745 \text{ \AA}$ ,  $c=13.465 \text{ \AA}$ .

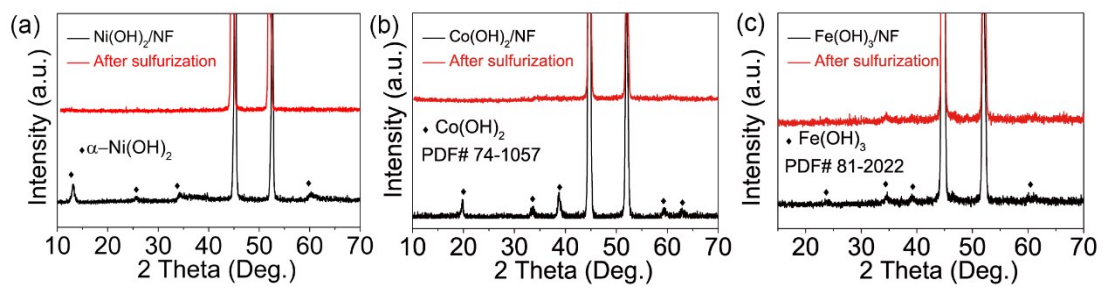

**Figure S4** XRD patterns of  $\text{Ni(OH)}_2/\text{NF}$ ,  $\text{Co(OH)}_2/\text{NF}$ ,  $\text{Fe(OH)}_3/\text{NF}$ , and corresponding Ni-S/NF, Co-S/NF, and Fe-S/NF electrodes after sulfurization.

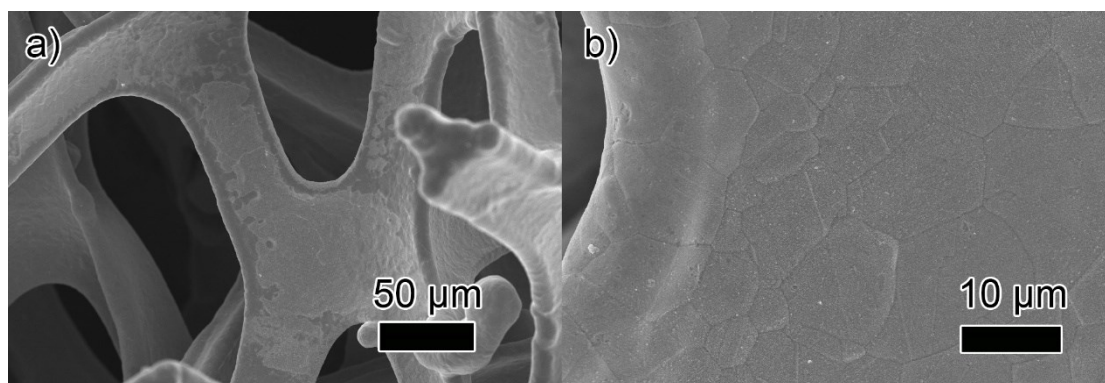

**Figure S5** SEM images of nickel foam.

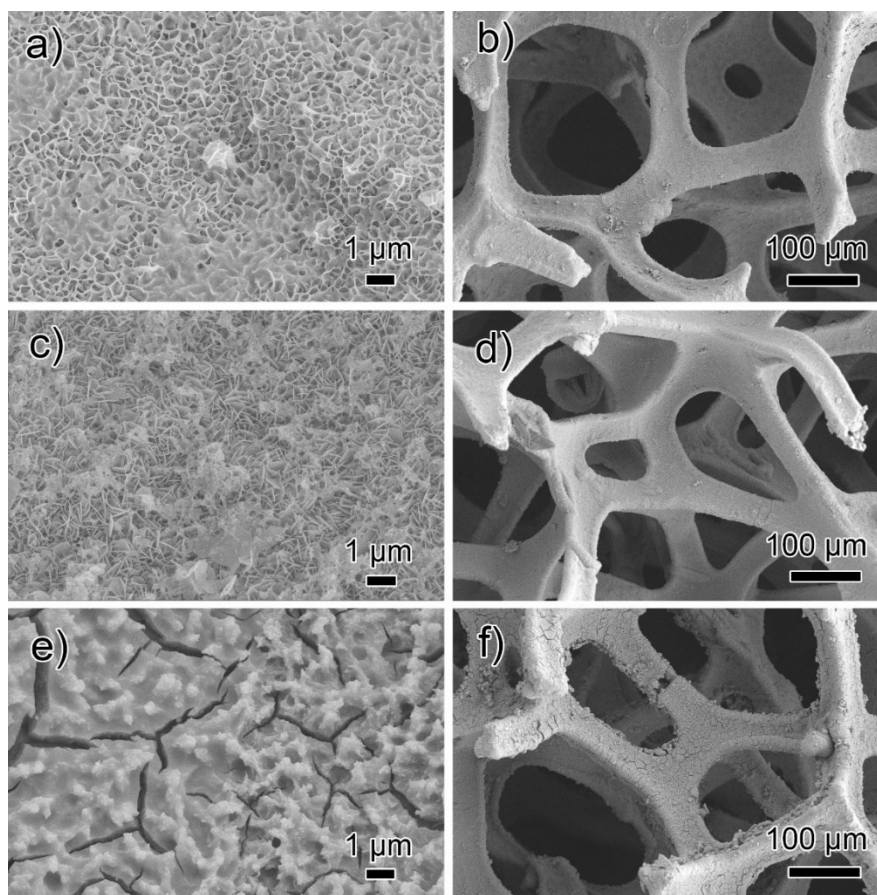

**Figure S6** SEM images of sulfurized Ni-S/NF (a, b), Co-S/NF (c, d), and Fe-S/NF (e, f) catalysts.

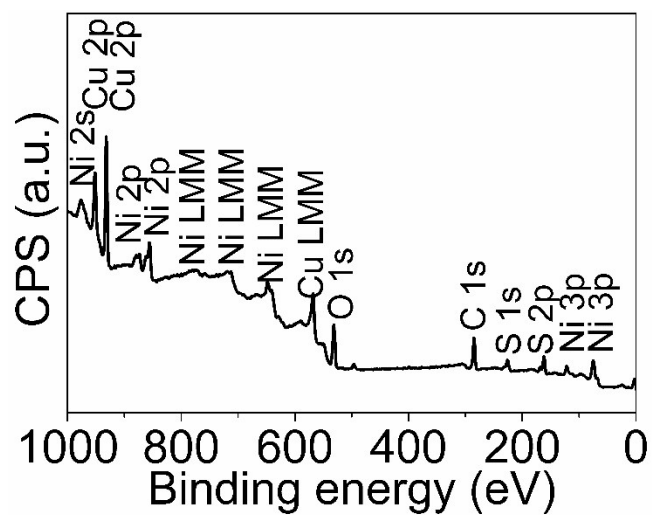

**Figure S7** Wide scan XPS spectra of the Cu<sub>2</sub>S/NF electrode.

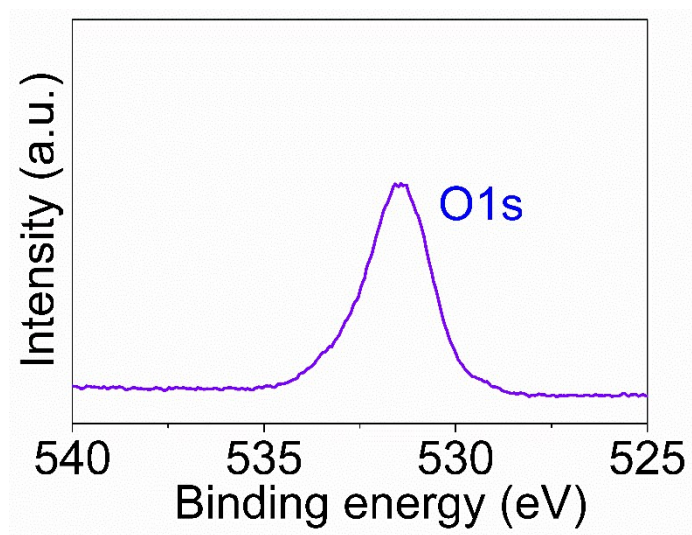

**Figure S8** XPS spectrum of O1s for the Cu<sub>2</sub>S/NF electrode.



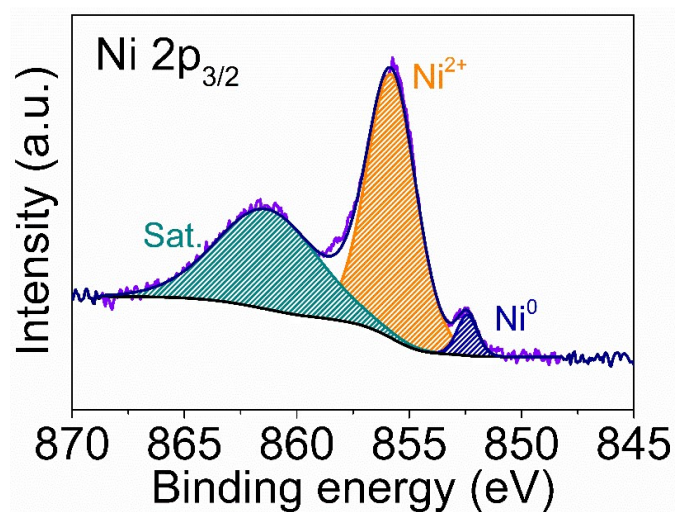

**Figure S9** XPS spectrum of Ni  $2p_{3/2}$  for the  $\text{Cu}_2\text{S}/\text{NF}$  electrode.

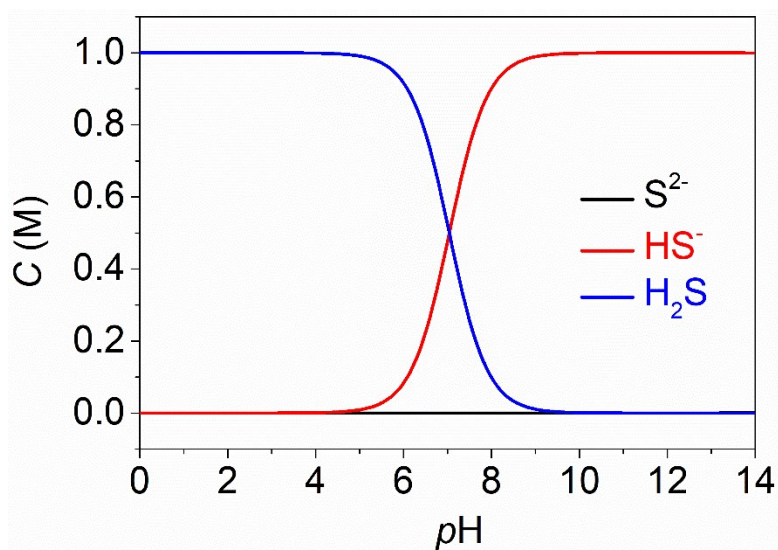

**Figure S10** Relationship between  $p\text{H}$  value (0-14) and concentrations of  $\text{H}_2\text{S}$  and  $\text{HS}^-$  at a concentration of  $1 \text{ mol L}^{-1}$  total S species based on  $pK_{a1} = 7.04$  and  $pK_{a2} = 17.10$ .<sup>[S14,S15]</sup>

**Table S3** ICP analysis of NaOH and Na<sub>2</sub>S used in electrolyte.

|    | NaOH<br>(wt%) | Na <sub>2</sub> S<br>(wt%) |    | NaOH<br>(wt%) | Na <sub>2</sub> S<br>(wt%) |
|----|---------------|----------------------------|----|---------------|----------------------------|
| Al | 0.000         | 0.001                      | Mn | 0.000         | 0.000                      |
| As | 0.000         | 0.000                      | Na | 48.841        | 18.549                     |
| B  | 0.000         | 0.000                      | Ni | 0.000         | 0.000                      |
| Be | 0.000         | 0.000                      | P  | 0.000         | 0.000                      |
| Ba | 0.000         | 0.000                      | Pb | 0.000         | 0.000                      |
| Bi | 0.001         | 0.002                      | Se | 0.001         | 0.001                      |
| Ca | 0.000         | 0.004                      | Sr | 0.000         | 0.000                      |
| Cd | 0.000         | 0.000                      | V  | 0.000         | 0.000                      |
| Co | 0.000         | 0.000                      | Zn | 0.000         | 0.000                      |
| Cr | 0.000         | 0.000                      | Mo | 0.000         | 0.000                      |
| Cu | 0.000         | 0.000                      | Pd | 0.000         | 0.000                      |
| Fe | 0.000         | 0.000                      | Re | 0.000         | 0.000                      |
| K  | 0.023         | 0.004                      | S  | 0.000         | 9.226                      |
| Li | 0.000         | 0.000                      | Sb | 0.000         | 0.000                      |
| Mg | 0.000         | 0.000                      | Si | 0.000         | 0.000                      |
| Ti | 0.000         | 0.000                      | W  | 0.000         | 0.000                      |

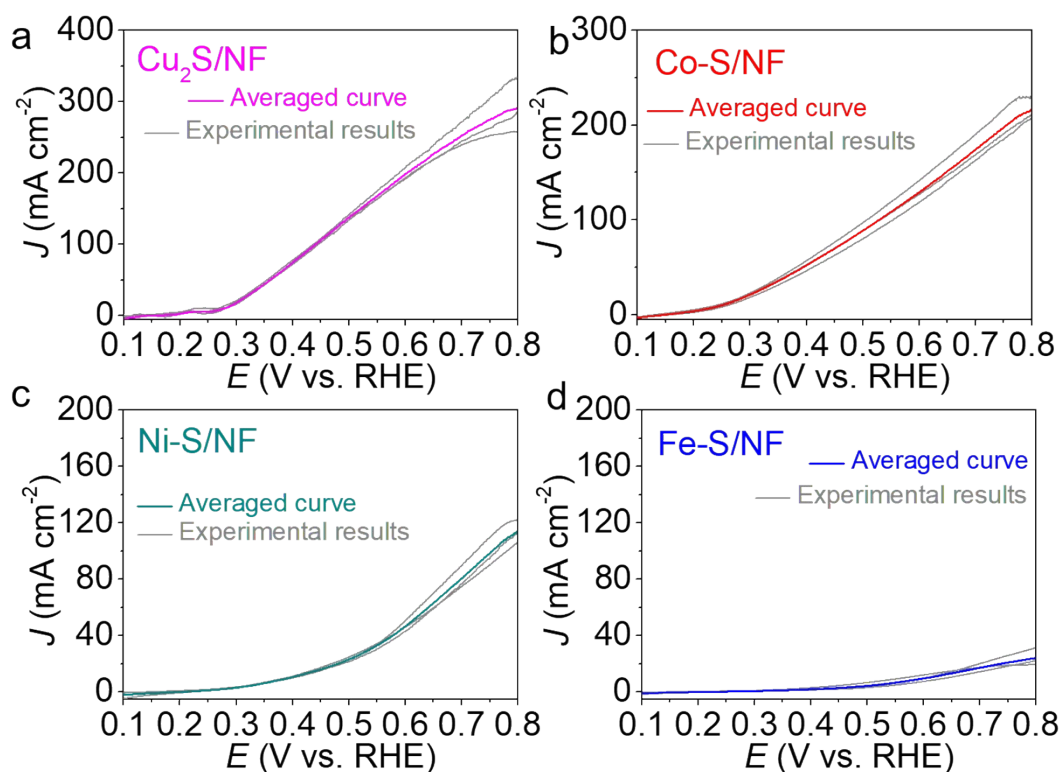

**Figure S11** LSV reproducibility test of the fabricated **a** Cu<sub>2</sub>S/NF, **b** Co-S/NF, **c** Ni-S/NF, and **d** Fe-S/NF electrodes for the SOR (each experiment was repeated three independent times, including electrode fabrication and electrochemical test).

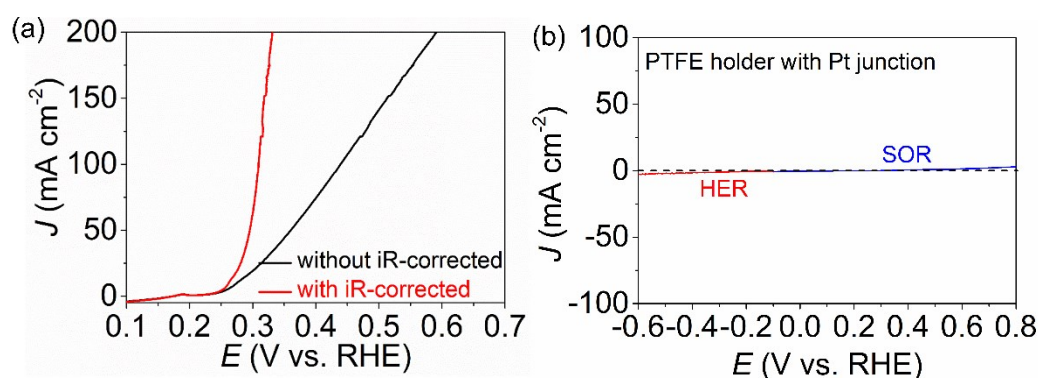

**Figure S12** (a) LSV curves of Cu<sub>2</sub>S/NF electrode in 1 mol L<sup>-1</sup> NaOH + 1 mol L<sup>-1</sup> Na<sub>2</sub>S electrolyte at a scan rate of 5 mV s<sup>-1</sup> ( $R_s$  (resistance of the solution) in this system was tested to be 1.3  $\Omega$ ). (b) Electrochemical effect of the PTFE holder with a Pt plate toward HER and SOR without electrodes.<sup>[S16]</sup>

**Table S4** Comparison of the current densities obtained at different potentials on various electrodes for SOR reactions<sup>a</sup>

| Catalysts                            | Reaction conditions                     | Current density<br>(mA cm <sup>-2</sup> ) | E (V)<br>vs. RHE | Ref.             |
|--------------------------------------|-----------------------------------------|-------------------------------------------|------------------|------------------|
| Cu <sub>2</sub> S/NF                 | 1 M NaOH                                | 10                                        | 0.26             | <b>This work</b> |
|                                      | +1M Na <sub>2</sub> S                   | 100                                       | 0.44             |                  |
| CoNi@NGs                             | 1 M NaOH                                | 10                                        | 0.34             | [S17]            |
|                                      | +1M Na <sub>2</sub> S                   | 100                                       | 0.52             |                  |
| NiCoO <sub>x</sub> -<br>CNTs         | 1 M NaOH                                | 10                                        | 0.37             | [S17]            |
|                                      | +1M Na <sub>2</sub> S                   | 50                                        | 0.50             |                  |
| IrO <sub>2</sub>                     | 1 M NaOH                                | 10                                        | 0.43             | [S17]            |
|                                      | +1M Na <sub>2</sub> S                   |                                           |                  |                  |
| Graphite<br>electrode                | 1 M NaOH+                               | 10                                        | 0.34             | [S18]            |
|                                      | 1M NaHS+2 M NaCl <sup>b</sup>           | 100                                       | 0.51             |                  |
| Pt electrode                         | 0.1 M Na <sub>2</sub> S<br>+ 1 M NaOH   | 0.1                                       | 1.8              | [S19]            |
| CoP<br>nanoarray                     | 1 M NaOH                                | 10                                        | 1.27             | [S20]            |
|                                      | +50 mM Na <sub>2</sub> S                | 20                                        | 1.31             |                  |
| Ir mixed-<br>metal oxide<br>(Ir-MMO) | 1 M NaOH<br>+1M Na <sub>2</sub> S       | 30                                        | 0.91             | [S21]            |
| Ru MMO                               | 50 mM NaOH<br>+50 mM Na <sub>2</sub> S  | 5                                         | 1.62             | [S22]            |
| TaO <sub>2</sub> /IrO <sub>2</sub>   | 1.6 M NaOH<br>+130 mM Na <sub>2</sub> S | 10                                        | 2.74 (cell)      | [S23]            |
| Pt disk                              | 1M Na <sub>2</sub> S                    | 100                                       | 1.0 (vs SCE)     | [S24]            |
| Carbon<br>cloth                      | 5 mM Na <sub>2</sub> S<br>+ 100 mM PBS  | 0.43                                      | 1.0              | [S25]            |

<sup>a</sup> The reactions were performed at room temperature without specific instruments.

<sup>b</sup> reaction occurred at 80 °C.

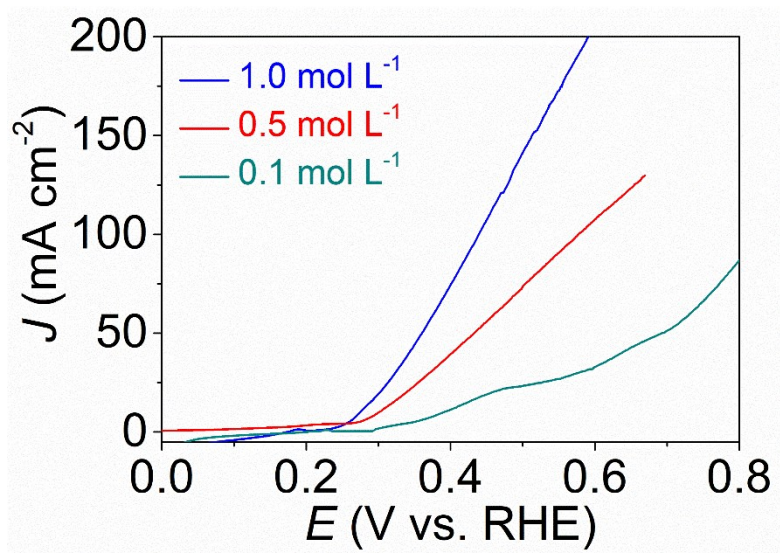

**Figure S13** LSV curves obtained on Cu<sub>2</sub>S/NF in the electrolyte containing 1 mol L<sup>-1</sup> NaOH with 0.1, 0.5, and 1.0 mol L<sup>-1</sup> Na<sub>2</sub>S.

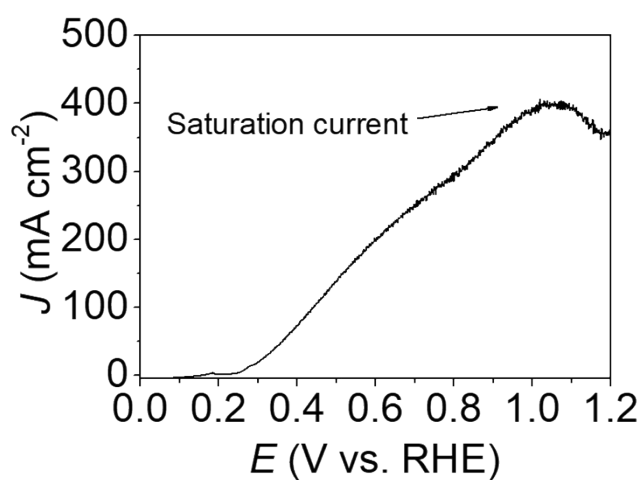

**Figure S14** LSV curve of the Cu<sub>2</sub>S/NF electrode with a wide potential window from 0 to 1.2 V vs. RHE. Electrolyte: 1 mol L<sup>-1</sup> NaOH + 1 mol L<sup>-1</sup> Na<sub>2</sub>S in water solution; scan rate: 5 mV s<sup>-1</sup>.

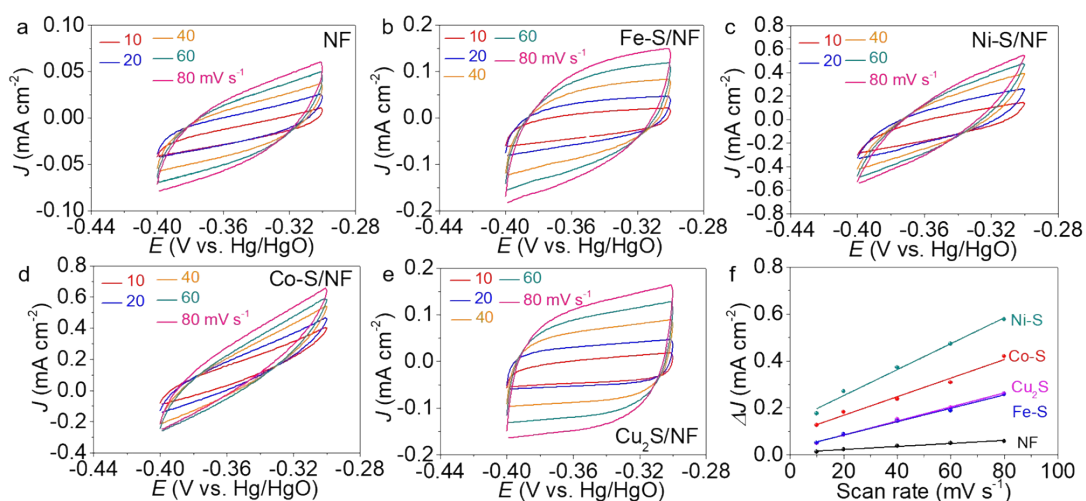

**Figure S15** (a-e) ECSA measurements of electrodes at different scan rate from 10 to 80  $\text{mV s}^{-1}$ , and (f) corresponding linear fitting of the relationship between scan rates and current densities.

**Table S5** ECSA results of electrodes based on Figure S15.

| Electrode                | C ( $\text{mF cm}^{-2}$ ) |
|--------------------------|---------------------------|
| Ni-S/NF                  | 5.42                      |
| Co-S/NF                  | 3.91                      |
| $\text{Cu}_2\text{S/NF}$ | 2.87                      |
| Fe-S/NF                  | 2.74                      |
| NF                       | 0.68                      |

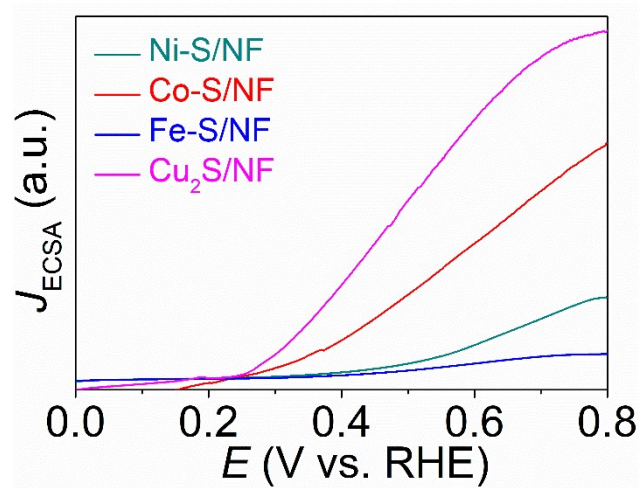

Figure S16 LSV curves based on ECSA results.

**Table S6** Parameters of ionization potential ( $I$ ), electron affinity ( $A$ ), and absolute hardness ( $\eta$ ) of selected cations<sup>a</sup>

| Cations          | $I$<br>(eV) | $A$<br>(eV) | $\eta=(I-A)/2$<br>(eV) | Soft or hard |
|------------------|-------------|-------------|------------------------|--------------|
| Cu <sup>+</sup>  | 20.29       | 7.73        | 6.28                   | Soft         |
| Co <sup>2+</sup> | 33.50       | 17.06       | 8.22                   | Borderline   |
| Ni <sup>2+</sup> | 35.71       | 18.17       | 8.50                   |              |
| Fe <sup>3+</sup> | 54.80       | 30.65       | 12.08                  | Hard         |

<sup>a</sup> Data obtained from Ref. [S26]

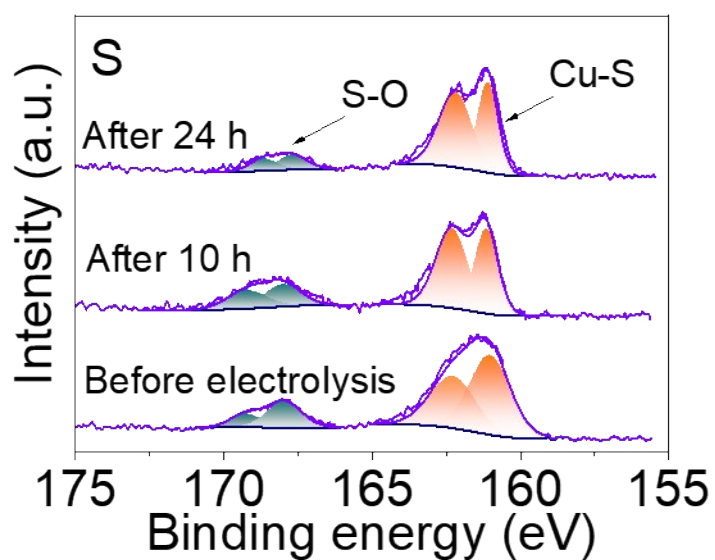

**Figure S17** XPS spectra of S of the Cu<sub>2</sub>S/NF electrodes before and after electrolysis at 100 mA cm<sup>-2</sup> for 10 and 24 h.



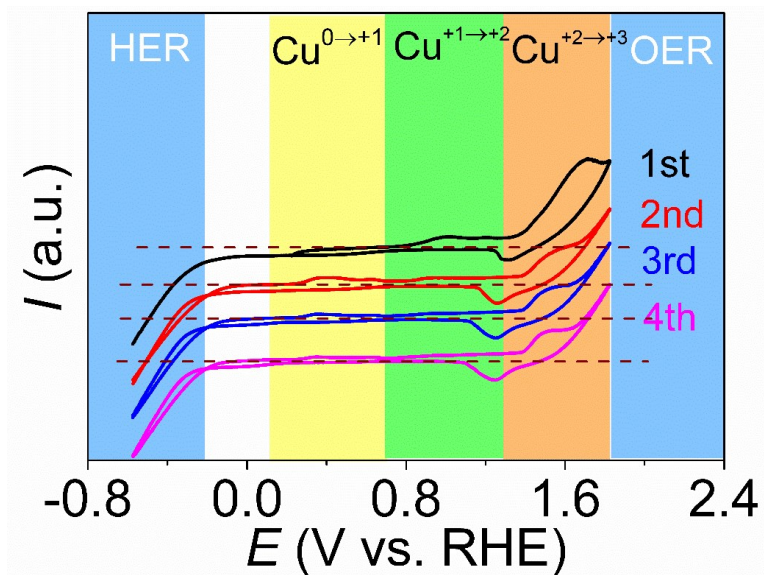

**Figure S18** CV curves of  $\text{Cu}_2\text{S}/\text{NF}$  electrode in  $1 \text{ mol L}^{-1}$  NaOH electrolyte from  $-0.6$  to  $1.8 \text{ V}$  at a scan rate of  $5 \text{ mV s}^{-1}$ .

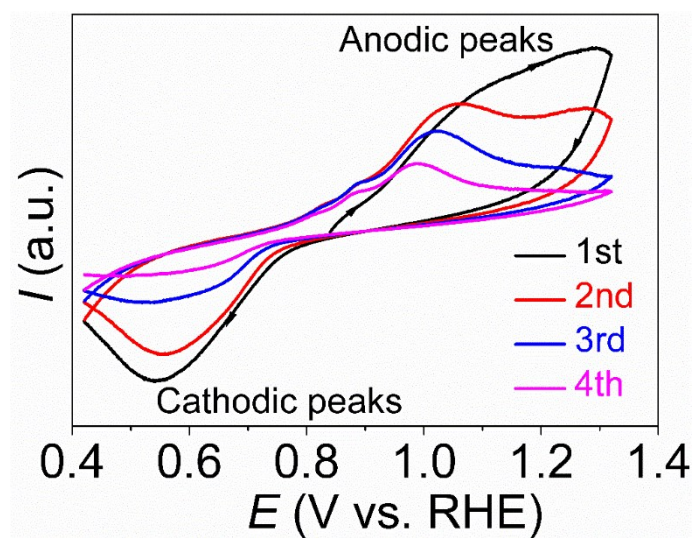

**Figure S19** CV curves of  $\text{Cu}_2\text{S}/\text{NF}$  electrode in  $1 \text{ mol L}^{-1}$  NaOH electrolyte from  $0.4$  to  $1.3 \text{ V}$  at a scan rate of  $10 \text{ mV s}^{-1}$ .

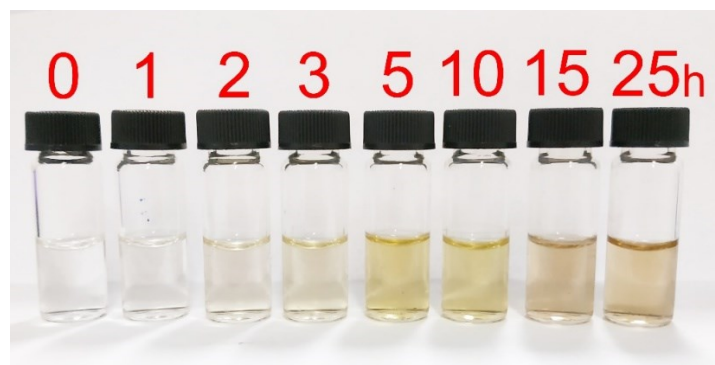

**Figure S20** Photographs of anodic electrolytes (diluted for 40 times) after SOR for 0 to 25 h on Cu<sub>2</sub>S/NF at a constant current density of 100 mA cm<sup>-2</sup>.

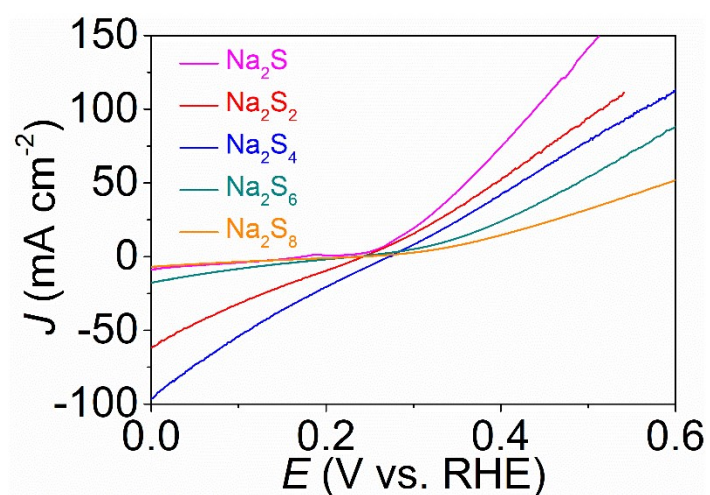

**Figure S21** LSV curves of the polysulfide electrooxidation reactions on the Cu<sub>2</sub>S/NF electrode. Electrolytes: 1 mol L<sup>-1</sup> NaOH + 1 mol L<sup>-1</sup> polysulfide (Na<sub>2</sub>S<sub>x</sub>, synthesized by stoichiometrically blending elemental sulfur and Na<sub>2</sub>S in alkaline medium to form clear solution,  $\text{HS}^- + (n-1)/8\text{S}_8 + \text{OH}^- = \text{S}_n^{2-} + \text{H}_2\text{O}$ ).

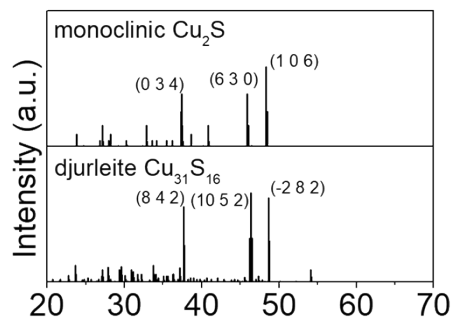

**Figure S22** Standard XRD patterns of the monoclinic  $\text{Cu}_2\text{S}$  (PDF#33-490) and djurleite  $\text{Cu}_{31}\text{S}_{16}$  (PDF#34-660).

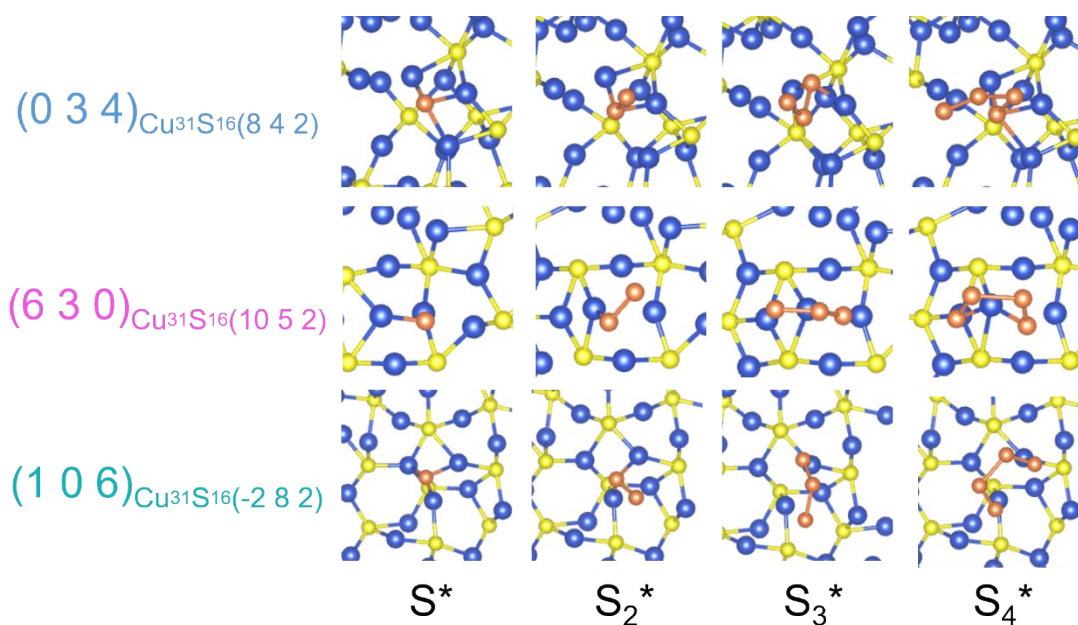

**Figure S23.** Schematic diagram of the adsorption states of  $\text{S}_x^*$  ( $x = 1, 2, 3, 4$ ) on the  $(0\ 3\ 4)_{\text{Cu}_{31}\text{S}_{16}(8\ 4\ 2)}$ ,  $(6\ 3\ 0)_{\text{Cu}_{31}\text{S}_{16}(10\ 5\ 2)}$ , and  $(1\ 0\ 6)_{\text{Cu}_{31}\text{S}_{16}(-2\ 8\ 2)}$  facets.

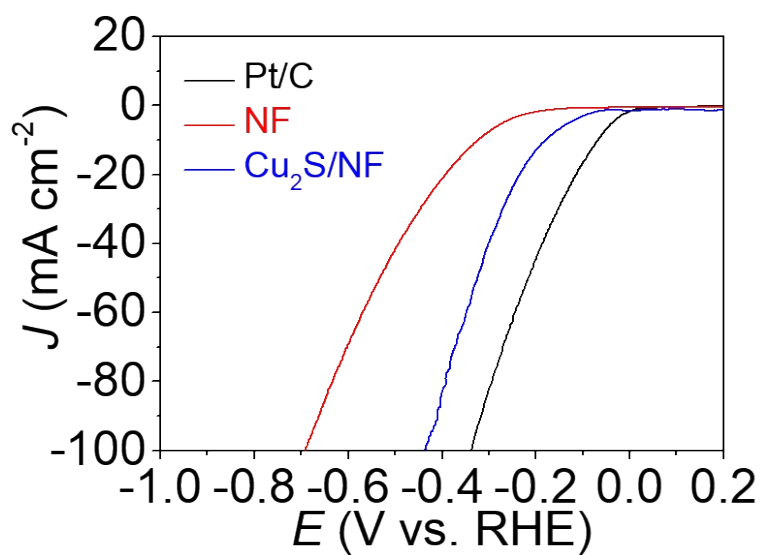

**Figure S24** LSV curves (without  $iR$ -corrected) obtained in 1 mol L<sup>-1</sup> NaOH on Cu<sub>2</sub>S/NF, NF, and Pt/C for HER at a scan rate of 5 mV s<sup>-1</sup>.

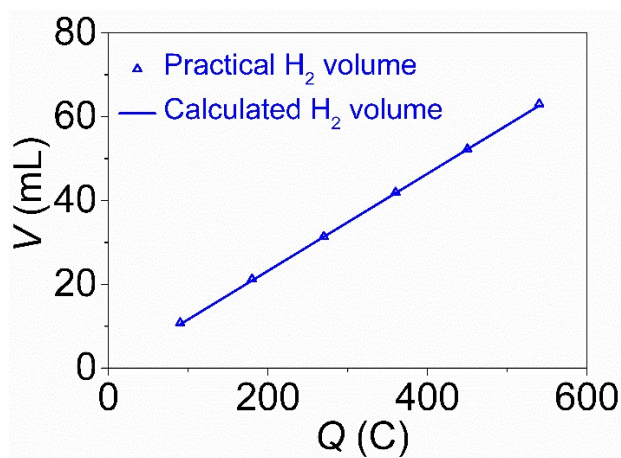

**Figure S25** Comparison between the theoretical and practical H<sub>2</sub> evolution.

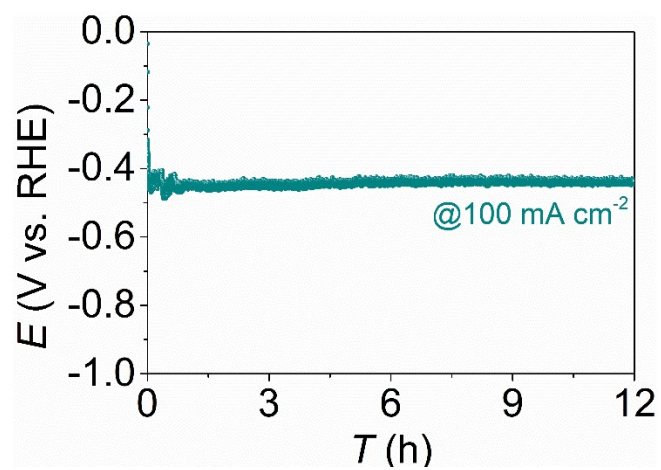

**Figure S26** Potential-time test of HER at the current density of  $100 \text{ mA cm}^{-2}$  catalyzed by the  $\text{Cu}_2\text{S/NF}$  electrode in  $1 \text{ mol L}^{-1}$  NaOH for 12 h.

**Table S7** Comparison of several room-temperature electrolytic hydrogen production systems in alkaline medium.

| No. | Catalyst system                                                                                                                            | Anodic electrolyte                              | Anodic Product    | $E_{COR}$ (V) <sup>a</sup> | $E_C$ (V) <sup>b</sup> | Current density <sup>c</sup> (mA cm <sup>-2</sup> ) | Ref.                 |
|-----|--------------------------------------------------------------------------------------------------------------------------------------------|-------------------------------------------------|-------------------|----------------------------|------------------------|-----------------------------------------------------|----------------------|
| 1   | CoS <sub>2</sub> /MoS <sub>2</sub>   <br>CoS <sub>2</sub> /MoS <sub>2</sub>                                                                | 1 M KOH +<br>0.5 M urea                         | N <sub>2</sub>    | 1.29                       | 1.29                   | 10                                                  | [S27]                |
| 2   | NiTe <sub>2</sub> /Ni(OH) <sub>2</sub>                                                                                                     | 1 M KOH<br>+0.33 M urea                         | N <sub>2</sub>    | 1.35                       | NG <sup>d</sup>        | 10                                                  | [S28]                |
| 3   | Ni <sub>2</sub> P/NF  Ni <sub>2</sub> P/NF                                                                                                 | 1.0 M KOH<br>+ 10 mM HMF                        | FDCA              | ~1.35                      | 1.44                   | 10                                                  | [S29]<br>15          |
| 4   | MoO <sub>2</sub> -FeP@C  <br>MoO <sub>2</sub> -FeP@C                                                                                       | 1.0 M KOH<br>+ 10 mM HMF                        | FDCA              | 1.35                       | 1.48                   | 10                                                  | [S31]<br>16          |
| 5   | Co(OH) <sub>2</sub> @HOS/CP  <br>Co(OH) <sub>2</sub> @HOS/CP                                                                               | 1.0 M KOH + 3<br>M methanol                     | Formate           | 1.38                       | 1.49                   | 10                                                  | [S13]<br>6           |
| 6   | Ni <sub>0.33</sub> Co <sub>0.67</sub> (OH) <sub>2</sub> /NF  <br>Ni <sub>0.33</sub> Co <sub>0.67</sub> (OH) <sub>2</sub> /NF<br>nanoneedle | 1.0 M KOH +<br>0.5 M methanol                   | Formate           | ~1.35                      | 1.50                   | 10                                                  | [S33]                |
| 7   | Ni-Mo-N/CFC  Ni-<br>Mo-N/CFC                                                                                                               | 1.0 M KOH +<br>0.1 M glycerol                   | Formate           | 1.30                       | 1.36                   | 10                                                  | [S32]                |
| 8   | PtCu  PtCu catalyst                                                                                                                        | 1.0 M KOH<br>+ CO                               | CO <sub>2</sub>   | ~0.5                       | NG <sup>d</sup>        | 50                                                  | [S34]                |
| 9   | Ni <sub>2</sub> P  Ni <sub>2</sub> P                                                                                                       | 1 M KOH+<br>0.5 mM THIQs                        | DHIQs             | ~1.3                       | ~1.4                   | 10                                                  | [S36]                |
| 10  | Ni <sub>2</sub> P   Ni <sub>2</sub> P                                                                                                      | 1.0 M KOH +<br>0.125 M<br>Benzylamine           | Benzonit-<br>rile | 1.34                       | 1.41                   | 10                                                  | [S37]                |
| 11  | Graphite  CoNi@NGs                                                                                                                         | 1.0 M NaOH+<br>1.0 M Na <sub>2</sub> S          | Sulfur            | ~0.35                      | NG <sup>d</sup>        | 10                                                  | [S17]                |
| 12  | <b>Cu<sub>2</sub>S/NF  Cu<sub>2</sub>S/NF</b>                                                                                              | <b>1.0 M<br/>NaOH+1.0 M<br/>Na<sub>2</sub>S</b> | <b>Sulfur</b>     | <b>0.26</b>                | <b>0.43</b>            | <b>10</b>                                           | <b>This<br/>work</b> |
| 13  | <b>Cu<sub>2</sub>S/NF  Cu<sub>2</sub>S/NF</b>                                                                                              | <b>1.0 M NaOH+<br/>1.0 M Na<sub>2</sub>S</b>    | <b>Sulfur</b>     | <b>0.29</b>                | <b>0.53</b>            | <b>30</b>                                           | <b>This<br/>work</b> |
| 14  | <b>Cu<sub>2</sub>S/NF  Cu<sub>2</sub>S/NF</b>                                                                                              | <b>1.0 M NaOH+<br/>1.0 M Na<sub>2</sub>S</b>    | <b>Sulfur</b>     | <b>0.32</b>                | <b>0.64</b>            | <b>100</b>                                          | <b>This<br/>work</b> |

<sup>a</sup>  $E_{COR}$ : anodic potential of chemical oxidation reaction, vs RHE.<sup>b</sup>  $E_C$ : cell voltage.<sup>c</sup> Current density: current density for  $E_{COR}$  and  $E_C$ .<sup>d</sup> NG: not given.

## References

- S1. Kresse, G.; Furthmüller, J., Efficiency of ab-initio total energy calculations for metals and semiconductors using a plane-wave basis set. *Computational Materials Science* **1996**, *6*(1), 15-50.
- S2. Blöchl, P. E., Projector augmented-wave method. *Physical review B* **1994**, *50*(24), 17953.
- S3. Kresse, G.; Furthmüller, J., Efficient iterative schemes for ab initio total-energy calculations using a plane-wave basis set. *Physical review B* **1996**, *54*(16), 11169.
- S4. Kresse, G.; Hafner, J., Ab initio molecular-dynamics simulation of the liquid-metal–amorphous-semiconductor transition in germanium. *Physical Review B* **1994**, *49*(20), 14251.
- S5. Perdew, J. P.; Chevary, J. A.; Vosko, S. H.; Jackson, K. A.; Pederson, M. R.; Singh, D. J.; Fiolhais, C., Atoms, molecules, solids, and surfaces: Applications of the generalized gradient approximation for exchange and correlation. *Physical review B* **1992**, *46* (11), 6671.
- S6. Kim, M.-C.; Nam, H.; Choi, J.; Kim, H. S.; Lee, H. W.; Kim, D.; Kong, J.; Han, S. S.; Lee, S. Y.; Park, H. S., Hydrogen bonding-mediated enhancement of bioinspired electrochemical nitrogen reduction on Cu<sub>2-x</sub>S catalysts. *ACS Catal.* **2020**, *10*(18), 10577-10584.
- S7. Evans, H. T., Crystal structure of low chalcocite. *Nature Physical Science* **1971**, *232*(29), 69-70.
- S8. Chen, L.; Hu, H.; Chen, Y.; Gao, J.; Li, G., Plasmonic Cu<sub>2-x</sub>S nanoparticles: a brief introduction of optical properties and applications. *Materials Advances* **2021**.
- S9. Lide, D. R., *CRC Handbook of Chemistry and Physics*. CRC press: **2004**; Vol. 85.
- S10. He, H. Y.; Fei, J.; Lu, J., Chemical Bath Deposition and Optical and Electrical Properties of Pure and Doped Fe<sub>2</sub>S<sub>3</sub> Films. *Micro and Nanosystems* **2014**, *6*(2), 126-132.
- S11. Ye, L.; Wen, Z.; Li, Z.; Huang, H., Hierarchical Architected Ternary

Nanostructures Photocatalysts with In(OH)<sub>3</sub> Nanocube on ZnIn<sub>2</sub>S<sub>4</sub>/NiS Nanosheets for Photocatalytic Hydrogen Evolution. *Solar RRL* **2020**, *4*, 2000027.

S12. Zuo, Y.; Liu, Y.; Li, J.; Du, R.; Han, X.; Zhang, T.; Arbiol, J.; Divins, N. J.; Llorca, J.; Guijarro, N.; Sivula, K.; Cabot, A., In Situ Electrochemical Oxidation of Cu<sub>2</sub>S into CuO Nanowires as a Durable and Efficient Electrocatalyst for Oxygen Evolution Reaction. *Chemistry of Materials* **2019**, *31*(18), 7732-7743.

S13. Xiang, K.; Wu, D.; Deng, X.; Li, M.; Chen, S.; Hao, P.; Guo, X.; Luo, J. L.; Fu, X. Z., Boosting H<sub>2</sub> Generation Coupled with Selective Oxidation of Methanol into Value-Added Chemical over Cobalt Hydroxide@Hydroxysulfide Nanosheets Electrocatalysts. *Advanced Functional Materials* **2020**, *30*, 1909610.

S14 May, P. M., Batka, D., Hefter, G., Konigsberger, E., Rowland, D., *Chemical Communications* **2018**, *54*, 1980-1983.

S15 Grethlein, A., Soni, B., Worden, R., Jain, M., *Applied Biochemistry and Biotechnology* **1992**, *34*, 233.

S16 Zheng, W.; Liu, M.; Lee, L. Y. S., Best Practices in Using Foam-Type Electrodes for Electrocatalytic Performance Benchmark. *ACS Energy Letters* **2020**, *5* (10), 3260-3264.

S17 Zhang, M.; Guan, J.; Tu, Y.; Chen, S.; Wang, Y.; Wang, S.; Yu, L.; Ma, C.; Deng, D.; Bao, X., Highly Efficient H<sub>2</sub> Production from H<sub>2</sub>S via a Robust Graphene-Encapsulated Metal Catalyst. *Energy & Environmental Science* **2020**, *13*(1), 119-126.

S18 Petrov K., Srinivasan S., Low temperature removal of hydrogen sulfide from sour gas and its utilization for hydrogen and sulfur production. *International Journal of Hydrogen Energy* **1996**, *21*, 163-169.

S19 Sanli A E, Yılmaz O, Aytaç A, A novel H<sub>2</sub>S/H<sub>2</sub>O<sub>2</sub> fuel cell operating at the temperature of 298 K. *International Journal of Energy Research* **2013**, *37*, 1205-1212.

S20 Hao S, Yang L, Liu D, et al., Replacing oxygen evolution with sodium sulfide electro-oxidation toward energy-efficient electrochemical hydrogen production: Using cobalt phosphide nanoarray as a bifunctional catalyst. *International Journal of Hydrogen Energy* **2017**, *42*, 26289-26295.

S21 Ntagia E, Fiset E, Truong Cong Hong L, Vaiopoulou E, Rabaey K,



Electrochemical treatment of industrial sulfidic spent caustic streams for sulfide removal and caustic recovery. *Journal of Hazardous Material* **2020**, 388, 121770.

S22 Ntagia E, Fiset E, da Silva Lima L, et al., Anode materials for sulfide oxidation in alkaline wastewater: An activity and stability performance comparison. *Water Research* **2019**, 149, 111-119.

S23 Vaiopoulou E, Provijn T, PrevotEAU A, Pikaar I, Rabaey K, Electrochemical sulfide removal and caustic recovery from spent caustic streams. *Water Research* **2016**, 92, 38-43.

S24 Zhao Y, Wang S, Varela H, et al., Spatiotemporal Pattern Formation in the Oscillatory Electro-Oxidation of Sulfide on a Platinum Disk. *The Journal of Physical Chemistry C* **2011**, 115, 12965-12971.

S25 Lin H, Williams N, King A, Hu B, Electrochemical sulfide removal by low-cost electrode materials in anaerobic digestion. *Chemical Engineering Journal* **2016**, 297, 180-192.

S26 Pearson, R. G., Absolute Electronegativity and Hardness: Application to Inorganic Chemistry. *Inorganic Chemistry* **1988**, 27(4), 734-740.

S27 Li, C.; Liu, Y.; Zhuo, Z.; Ju, H.; Li, D.; Guo, Y.; Wu, X.; Li, H.; Zhai, T., Local Charge Distribution Engineered by Schottky Heterojunctions toward Urea Electrolysis. *Advanced Energy Materials* **2018**, 8(27), 1801775.

S28 Xu, B.; Yang, X.; Liu, X.; Song, W.; Sun, Y.; Liu, Q.; Yang, H.; Li, C., Lattice Distortion in Hybrid NiTe<sub>2</sub>/Ni(OH)<sub>2</sub> Nanosheets as Efficient Synergistic Electrocatalyst for Water and Urea Oxidation. *Journal of Power Sources* **2020**, 449, 227585.

S29 You, B.; Jiang, N.; Liu, X.; Sun, Y., Simultaneous H<sub>2</sub> Generation and Biomass Upgrading in Water by an Efficient Noble-Metal-Free Bifunctional Electrocatalyst. *Angewandte Chemie International Edition* **2016**, 128, 10067-10071.

S30 Zhao, Y.; Jia, N.; Wu, X.-R. Li, F.-M.; Chen, P.; Jin, P.-J.; Yin, S.; Chen, Y., Rhodium Phosphide Ultrathin Nanosheets for Hydrazine Oxidation Boosted Electrochemical Water Splitting. *Applied Catalysis B: Environmental* **2020**, 270, 118880.

- S31 Yang, G.; Jiao, Y.; Yan, H.; Xie, Y.; Wu, A.; Dong, X.; Guo, D.; Tian, C.; Fu, H., Interfacial Engineering of MoO<sub>2</sub>-FeP Heterojunction for Highly Efficient Hydrogen Evolution Coupled with Biomass Electrooxidation. *Advanced Materials* **2020**, *32*, 2000455.
- S32 Li, Y.; Wei, X.; Chen, L.; Shi, J.; He, M., Nickel-molybdenum Nitride Nanoplate Electrocatalysts for Concurrent Electrolytic Hydrogen and Formate Productions. *Nature Communications* **2019**, *10*, 5335.
- S33 Li, M.; Deng, X.; Xiang, K.; Liang, Y.; Zhao, B.; Hao, J.; Luo, J. L.; Fu, X. Z., Value-added Formate Production from Selective Methanol Oxidation as A Novel Anodic Reaction to Enhance Electrochemical Hydrogen Co-generation. *ChemSusChem* **2019**, *13*(5), 914-921..
- S34 Cui, X.; Su, H. Y.; Chen, R.; Yu, L.; Dong, J.; Ma, C.; Wang, S.; Li, J.; Yang, F.; Xiao, J.; Zhang, M.; Ma, D.; Deng, D.; Zhang, D. H.; Tian, Z.; Bao, X., Room-temperature Electrochemical Water-gas Shift Reaction for High Purity Hydrogen Production. *Nature Communications* **2019**, *10*, 86.
- S35 Hao, S.; Yang, L.; Liu, D.; Kong, R.; Du, G.; Asiri, A. M.; Yang, Y.; Sun, X., Integrating Natural Biomass Electro-oxidation and Hydrogen Evolution: Using a Porous Fe-doped CoP Nanosheet Array as a Bifunctional Catalyst. *Chemical Communications* **2017**, *53*(42), 5710-5713.
- S36 Huang, C.; Huang, Y.; Liu, C.; Yu, Y.; Zhang, B., Integrating Hydrogen Production with Aqueous Selective Semi-Dehydrogenation of Tetrahydroisoquinolines over a Ni<sub>2</sub>P Bifunctional Electrode. *Angewandte Chemie International Edition* **2019**, *58*(35), 12014-12017.
- S37 Ding, Y.; Miao, B.-Q.; Li, S.-N.; Jiang, Y.-C.; Liu, Y.-Y.; Yao, H.-C.; Chen, Y., Benzylamine oxidation boosted electrochemical water-splitting: Hydrogen and benzonitrile co-production at ultra-thin Ni<sub>2</sub>P nanomeshes grown on nickel foam. *Applied Catalysis B: Environmental* **2020**, *268*, 118393.
